# Supplementary material for: Identification of Urinary Biomarkers of Colon Inflammation in IL10-/- Mice Using Short‐Column LCMS Metabolomics
Source: Hindawi journal article supplement (doi:10.1155/2011/974701), 2010-12-06
Supplement: f1 [file 974701.f1.pdf]

Table S1: Mass spectral ions identified by Short-Column LCMS as occurring at significantly different concentrations in the urine of IL10<sup>-/-</sup> and wild-type mice (P < 0.01, FDR adjusted P<0.05 unless otherwise stated). Ions in bold font are discussed.

|                     | Negative ions ( <i>m/z</i> )                                                                                                                                                                                                                                                                                                                                                                                                                                                                                                                                                                                                                                                                                                                                                                                                                                                                                                                                                                                                                                                                                                                                                                                                                                                                                                            | Positive Ions ( <i>m/z</i> )                                                             |
|---------------------|-----------------------------------------------------------------------------------------------------------------------------------------------------------------------------------------------------------------------------------------------------------------------------------------------------------------------------------------------------------------------------------------------------------------------------------------------------------------------------------------------------------------------------------------------------------------------------------------------------------------------------------------------------------------------------------------------------------------------------------------------------------------------------------------------------------------------------------------------------------------------------------------------------------------------------------------------------------------------------------------------------------------------------------------------------------------------------------------------------------------------------------------------------------------------------------------------------------------------------------------------------------------------------------------------------------------------------------------|------------------------------------------------------------------------------------------|
| <b>Experiment 1</b> | <b>160, 204, 161, 131, 609, 233, 205.</b><br>(FDR > 0.05: <b>453, 495, 308</b> )                                                                                                                                                                                                                                                                                                                                                                                                                                                                                                                                                                                                                                                                                                                                                                                                                                                                                                                                                                                                                                                                                                                                                                                                                                                        | <b>206</b><br>(P > 0.01: <b>497, 382</b> )                                               |
| <b>Experiment 2</b> | <b>160, 453, 204, 205, 161,</b> 231, 778, <b>116, 495,</b><br>425, 471, 188, 329, 456, 428, 107, <b>308,</b> 245,<br><b>283,</b> 187, 567, <b>284,</b> 632, 645, 566, 872, 609,<br>633, 261, 568, 108, 499, 592, 874, 254, 457,<br>688, 779, 777, 833, 324, 501, 593, 502, 873,<br>710, 285, 689, 275, <b>206,</b> 455, <b>496,</b> 644, 348,<br>832, 667, <b>498,</b> 631, 426, 277, 758, 806, 125,<br>246, 474, 500, 334, 861, 871, 472, 337, <b>497,</b><br>328, 408, <b>380,</b> 186, 700, 711, 189, 439, 476,<br>712, 713, 401, 529, 424, 658, 199, 478, 200,<br>155, 423, 223, 281, 646, 250, 699, 470, 147,<br>858, 657, 708, 402, 660, 844, 293, 938, 687,<br>683, 131, 360, 807, 400, 857, 503, 477, 759,<br>648, 659, 336, 298, 668, 351, 936, 897, 860,<br>209, 757, 702, 991, 634, 252, 709, 618, 801,<br>395, 776, 647, 440, 418, 690, 615, 524, 262,<br>412, 812, 260, 952, 232, 353, 494, 617, 278,<br>986, 175, 933, 686, 403, 233, 804, 780, 939,<br>253, 656, 137, 299, 630, 684, 643, 875, 371,<br>356, 106, 727, 608, 512, 218, 274, 307, 526,<br>881, 661, 445, 396, 937, 475, 701, 859, 987,<br>264, 393, 541, 990, 856, 279, 417, 268, 994,<br>670, 383, 993, 300, 636, 669, 286, 916, 120,<br>927, 190, 349, 134, 174, 427, 805, 269, 164.<br>(93 ion clusters with 48 clusters containing two<br>or more ions) | <b>382,</b> 519, 151, <b>497,</b> 236,<br>285, 252, 572, 234, 737,<br>263, 118, 514, 218 |

Table S2: Mass time identifiers (M(*m/z*)T(seconds)), fold changes and T and P values (corrected FDR 0.05) for top scoring metabolite ions obtained from UHPLC-MS analysis comparing urine samples from IL10<sup>-/-</sup> and C57 mice irrespective of whether mice had been housed under SPF or conventional conditions. Negative T values indicate metabolites higher in IL10<sup>-/-</sup> mice. Ions in bold font are discussed in the text.

| Positive ions        |             |        |                   | Negative ions        |             |        |                   |
|----------------------|-------------|--------|-------------------|----------------------|-------------|--------|-------------------|
| Mass time identifier | Fold change | T      | P <sub>corr</sub> | Mass time identifier | Fold change | T      | P <sub>corr</sub> |
| <b>M206T94</b>       | 2.39        | -13.13 | <9E-12            | M249T94              | 2.27        | -12.07 | <5E-14            |
| <b>M207T94</b>       | 2.17        | -13.21 | <9E-12            | M251T94              | 2.12        | -10.33 | <5E-14            |
| <b>M208T94</b>       | 1.55        | -10.86 | <9E-12            | <b>M380T82</b>       | 1.99        | 9.78   | <5E-14            |
| M246T94              | 2.22        | -10.61 | <9E-12            | M409T95              | 3.32        | -10.56 | <5E-14            |
| M248T94              | 1.96        | -11.04 | <9E-12            | <b>M453T145</b>      | 1.82        | 9.07   | 5.56E-14          |
| M437T44              | 2.18        | 8.10   | 9.74E-12          | <b>M381T82</b>       | 1.87        | 9.12   | 9.26E-14          |
| M342T45              | 1.70        | 7.33   | 7.08E-10          | M414T80              | 3.73        | -9.22  | 2.65E-13          |
| M245T96              | 1.49        | -6.82  | 9.21E-09          | M385T45              | 2.86        | 8.49   | 8.68E-13          |
| M368T170             | 1.64        | -5.99  | 8.50E-07          | M321T145             | 1.94        | 7.59   | 9.75E-11          |
| M179T93              | 1.22        | 5.34   | 1.15E-05          | M613T94              | 3.25        | -7.32  | 6.9E-10           |
| <b>M382T85</b>       | 1.40        | 5.22   | 1.91E-05          | <b>M366T84</b>       | 1.67        | -7.20  | 1.18E-09          |
| <b>M383T85</b>       | 1.41        | 5.17   | 2.27E-05          | M436T93              | 2.27        | -6.97  | 2.32E-09          |
| M705T138             | 1.43        | 5.09   | 3.25E-05          | M761T82              | 3.51        | 7.32   | 2.79E-09          |
| M344T123             | 1.36        | -4.78  | 1.13E-04          | M287T54              | 1.49        | 6.77   | 7.21E-09          |
| M316T123             | 1.36        | -4.72  | 1.38E-04          | M640T94              | 2.49        | -6.66  | 1.03E-08          |
| M706T138             | 1.40        | 4.67   | 1.67E-04          | M602T143             | 2.17        | 6.29   | 1.02E-07          |
| M404T68              | 1.50        | -4.39  | 5.18E-04          | M246T166             | 1.94        | 5.79   | 8.1E-07           |
| M556T129             | 1.42        | -4.28  | 6.95E-04          | M703T138             | 1.48        | 5.67   | 1.52E-06          |
| M374T142             | 1.37        | -4.20  | 9.07E-04          | M232T94              | 1.62        | -5.77  | 1.56E-06          |
| M423T111             | 1.46        | -4.09  | 1.37E-03          | M283T45              | 1.47        | -5.54  | 2.59E-06          |

|                 |      |       |          |                 |      |       |          |
|-----------------|------|-------|----------|-----------------|------|-------|----------|
| M304T87         | 1.39 | -4.05 | 1.46E-03 | <b>M204T91</b>  | 1.39 | -5.48 | 3.38E-06 |
| M528T233        | 1.74 | 4.02  | 1.60E-03 | M278T93         | 1.80 | -5.29 | 7.6E-06  |
| M473T127        | 1.57 | -3.99 | 1.74E-03 | M300T160        | 1.41 | -5.25 | 9.02E-06 |
| M637T101        | 1.45 | -3.96 | 1.83E-03 | M277T93         | 1.90 | -5.14 | 1.39E-05 |
| M362T68         | 1.50 | -3.92 | 2.10E-03 | M469T137        | 1.47 | 5.10  | 1.62E-05 |
| M181T92         | 1.20 | 3.85  | 2.52E-03 | M231T93         | 1.84 | -5.08 | 1.63E-05 |
| M587T133        | 1.38 | -3.84 | 2.58E-03 | M244T70         | 1.65 | 4.95  | 2.72E-05 |
| M274T175        | 1.39 | -3.73 | 3.77E-03 | M540T94         | 2.17 | -4.97 | 3.31E-05 |
| M230T124        | 1.32 | -3.70 | 4.00E-03 | <b>M495T117</b> | 1.52 | 4.72  | 7.19E-05 |
| M737T121        | 1.81 | -3.63 | 5.21E-03 | M205T91         | 1.30 | -4.67 | 8.73E-05 |
| M566T99         | 1.64 | -3.55 | 6.78E-03 | M233T93         | 1.57 | -4.63 | 9.7E-05  |
| M549T88         | 1.35 | -3.50 | 0.0076   | M290T166        | 1.35 | 4.57  | 0.0001   |
| M632T102        | 1.51 | -3.47 | 0.0079   | M418T118        | 1.91 | -4.56 | 0.0001   |
| M591T122        | 1.28 | -3.45 | 0.0081   | M611T118        | 1.90 | -4.50 | 0.0002   |
| M600T105        | 1.29 | -3.42 | 0.0088   | <b>M454T145</b> | 1.40 | 4.42  | 0.0002   |
| M999T155        | 1.21 | 3.32  | 0.0119   | M279T92         | 1.78 | -4.38 | 0.0002   |
| M625T46         | 1.36 | -3.30 | 0.0126   | M354T105        | 1.37 | 4.37  | 0.0002   |
| M405T111        | 1.33 | -3.29 | 0.0127   | M612T118        | 1.65 | -4.31 | 0.0003   |
| M390T52         | 1.28 | -3.28 | 0.0126   | M263T87         | 1.53 | -4.28 | 0.0003   |
| M271T111        | 1.17 | -3.27 | 0.0129   | M254T78         | 1.65 | -4.25 | 0.0004   |
| <b>M497T116</b> | 1.35 | 3.25  | 0.0136   | M536T111        | 1.44 | -4.25 | 0.0004   |
| M460T112        | 1.30 | -3.18 | 0.0166   | M419T118        | 1.62 | -4.24 | 0.0004   |
| M249T162        | 1.38 | -3.16 | 0.0174   | M526T233        | 1.71 | 4.19  | 0.0005   |
| M788T125        | 1.33 | -3.15 | 0.0173   | M382T79         | 1.29 | 4.02  | 0.0008   |
| M474T102        | 1.34 | -3.15 | 0.0172   | M274T123        | 1.40 | -4.02 | 0.0008   |
| M619T116        | 1.35 | -3.13 | 0.0180   | M415T161        | 1.60 | -3.98 | 0.0009   |
| M248T162        | 1.36 | -3.12 | 0.0178   | M810T112        | 1.65 | -3.97 | 0.0010   |
| M226T121        | 1.28 | -3.10 | 0.0186   | M704T138        | 1.33 | 3.86  | 0.0014   |

|          |      |       |        |                |      |       |        |
|----------|------|-------|--------|----------------|------|-------|--------|
| M289T88  | 1.22 | 3.11  | 0.0182 | M574T114       | 1.44 | -3.84 | 0.0015 |
| M283T52  | 1.16 | -3.03 | 0.0223 | M492T96        | 1.67 | -3.83 | 0.0015 |
| M850T140 | 1.28 | 3.03  | 0.0223 | M627T113       | 1.40 | -3.78 | 0.0018 |
| M545T112 | 1.27 | -3.01 | 0.0229 | M480T92        | 1.48 | -3.65 | 0.0029 |
| M275T175 | 1.25 | -3.00 | 0.0233 | M343T137       | 1.29 | 3.56  | 0.0038 |
| M178T62  | 1.26 | 3.00  | 0.0244 | M809T112       | 1.67 | -3.56 | 0.0037 |
| M596T83  | 1.32 | -2.96 | 0.0255 | M292T174       | 1.32 | 3.54  | 0.0040 |
| M461T110 | 1.22 | -2.93 | 0.0273 | M254T131       | 1.39 | 3.52  | 0.0044 |
| M261T121 | 1.26 | -2.91 | 0.0288 | M470T111       | 1.27 | 3.44  | 0.0055 |
| M582T105 | 1.25 | -2.89 | 0.0303 | M449T113       | 1.29 | -3.43 | 0.0056 |
| M285T45  | 1.17 | -2.87 | 0.0309 | <b>M308T85</b> | 1.31 | -3.32 | 0.0078 |
| M389T50  | 1.22 | -2.87 | 0.0309 | M303T101       | 1.58 | 3.28  | 0.0089 |
| M320T109 | 1.19 | -2.86 | 0.0307 | M222T63        | 1.51 | 3.29  | 0.0089 |
| M360T108 | 1.22 | -2.86 | 0.0307 | M404T112       | 1.26 | -3.22 | 0.0105 |
| M393T104 | 1.22 | -2.82 | 0.0339 | M246T90        | 1.22 | -3.17 | 0.0122 |
| M381T90  | 1.27 | -2.79 | 0.0357 | M401T148       | 1.27 | 3.15  | 0.0128 |
| M276T111 | 1.29 | -2.78 | 0.0374 | M392T126       | 1.27 | -3.12 | 0.0139 |
| M277T123 | 1.34 | -2.77 | 0.0373 | M596T53        | 1.29 | -3.11 | 0.0139 |
| M608T102 | 1.25 | -2.74 | 0.0405 | M288T63        | 1.36 | -3.10 | 0.0143 |
| M431T138 | 1.32 | -2.73 | 0.0406 | M340T90        | 1.39 | 3.10  | 0.0141 |
| M387T116 | 1.34 | -2.70 | 0.0443 | M143T46        | 1.14 | 3.03  | 0.0171 |
| M293T109 | 1.34 | -2.69 | 0.0444 | M412T91        | 1.65 | -3.00 | 0.0187 |
|          |      |       |        | M256T112       | 1.47 | 2.95  | 0.0213 |
|          |      |       |        | M334T108       | 1.23 | -2.92 | 0.0230 |
|          |      |       |        | M397T144       | 1.27 | -2.91 | 0.0232 |
|          |      |       |        | M170T114       | 1.15 | -2.85 | 0.0277 |
|          |      |       |        | M333T50        | 1.33 | -2.83 | 0.0293 |
|          |      |       |        | M288T122       | 1.26 | -2.82 | 0.0294 |

|  |          |      |       |        |
|--|----------|------|-------|--------|
|  | M405T112 | 1.33 | -2.82 | 0.0294 |
|  | M355T106 | 1.24 | 2.81  | 0.0296 |
|  | M353T63  | 2.09 | 2.83  | 0.0295 |
|  | M227T91  | 1.29 | 2.78  | 0.0320 |
|  | M217T86  | 1.19 | -2.77 | 0.0319 |
|  | M433T127 | 1.36 | -2.76 | 0.0331 |
|  | M511T117 | 1.25 | -2.70 | 0.0385 |
|  | M236T142 | 1.18 | 2.70  | 0.0386 |
|  | M226T83  | 1.25 | 2.70  | 0.0385 |
|  | M389T93  | 1.85 | -2.68 | 0.0400 |
|  | M209T130 | 1.53 | 2.65  | 0.0440 |
|  | M577T125 | 1.21 | -2.62 | 0.0454 |
|  | M344T185 | 1.27 | -2.61 | 0.0461 |
|  | M326T175 | 1.33 | -2.60 | 0.0468 |
|  | M314T145 | 1.22 | 2.60  | 0.0469 |
|  | M299T156 | 1.26 | -2.57 | 0.0502 |
|  | M163T75  | 1.15 | -2.57 | 0.0498 |
